# Supplementary material
Source: ML conference proceedings conference paper supplement (https://proceedings.neurips.cc/paper_files/paper/2022/hash/6ca5d2665de83394f437dad0c3746907-Abstract.html)
Supplement: Supplementary file 1 [file 6ca5d2665de83394f437dad0c3746907-Supplemental-Conference.zip]

Archive with 2 entries (2 files):
- Appendix.pdf
- FullPaper.pdf
